# Supplementary material for: FITC‐Labeled Alendronate as an In Vivo Bone pH Sensor
Source: Hindawi journal article supplement (doi:10.1155/2020/4012194), 2020-01-01
Supplement: f1 [file 4012194.f1.pdf]

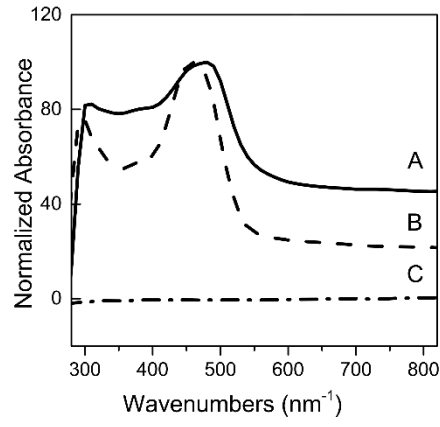

S1

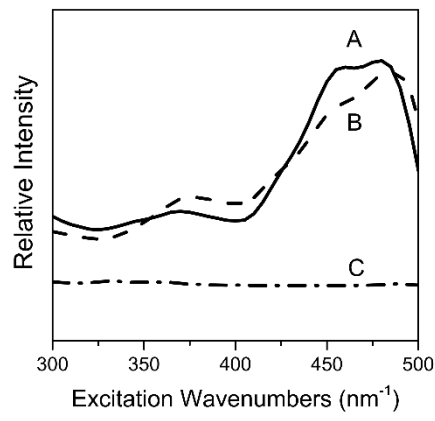

S2

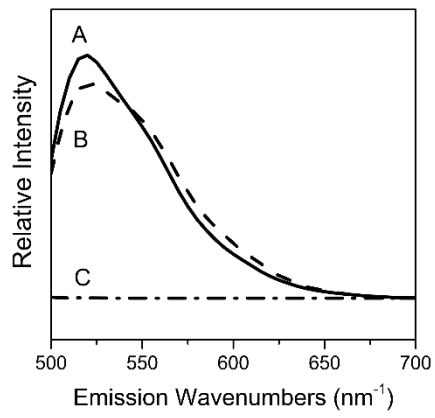

S3

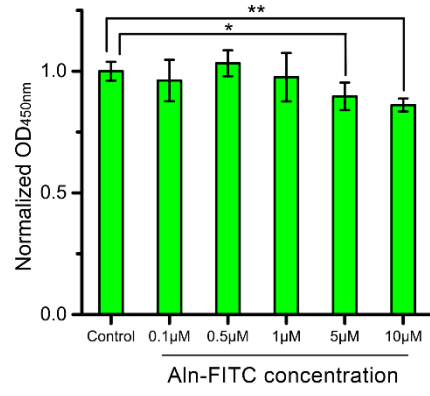

S4

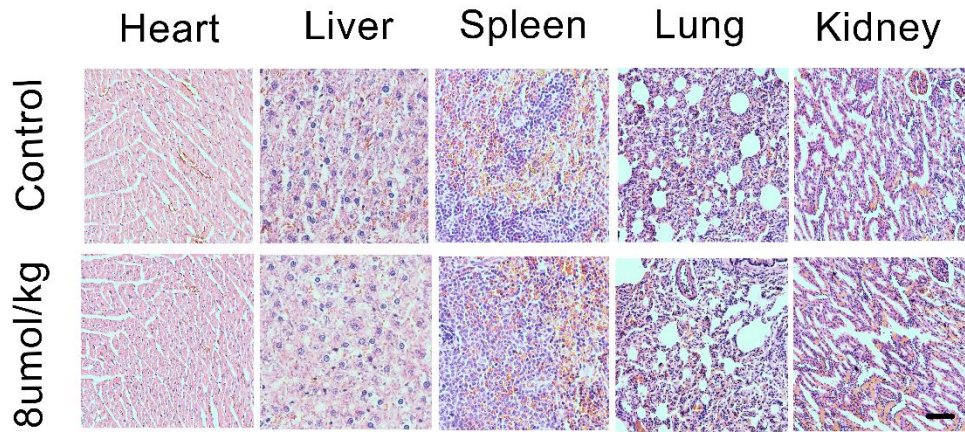

S5
